# Supplementary material
Source: Springer Nature journal article supplement (https://www.springermedizin.de/resource/supplementary/12890_2012_454_MOESM5_ESM.pdf/9505574)

**A**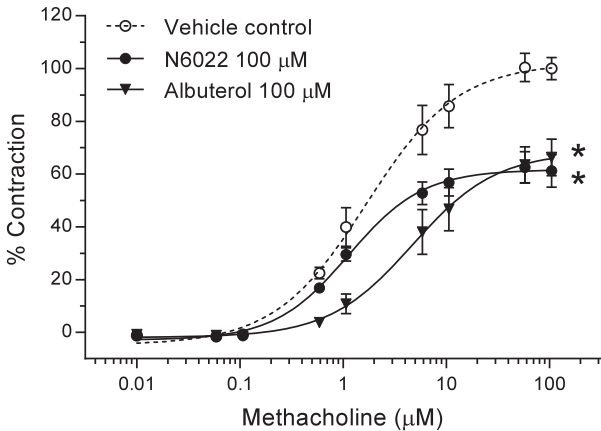**B**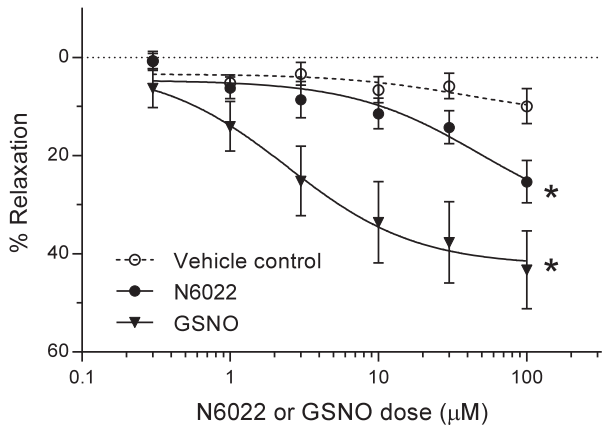

Supplement: MOESM5 [file 9505574]
